# Supplementary material
Source: MDPI journal article supplement (https://www.mdpi.com/1999-4907/13/7/1145)
Supplement: s1 [file s1]

**Microbial residue distribution in microaggregates decreases with stand age in subtropical plantations**

Yanli Jing<sup>1,2</sup>, Xuechao Zhao<sup>2,3</sup>, Shengen Liu<sup>4</sup>, Peng Tian<sup>5</sup>, Zhaolin Sun<sup>5</sup>, Longchi Chen<sup>2</sup> and Qingkui Wang<sup>2,\*</sup>

<sup>1</sup> Ecology Security and Protection Key Laboratory of Sichuan Province, Mianyang Normal University, Mianyang, 621000, China

<sup>2</sup> Huitong Experimental Station of Forest Ecology, CAS Key Laboratory of Forest Ecology and Management, Institute of Applied Ecology, Shenyang, 110016, China

<sup>3</sup> University of Chinese Academy of Sciences, Beijing 100049, China

<sup>4</sup> College of Biological and Pharmaceutical Sciences, China Three Gorges University, Yichang, 443000, China.

<sup>5</sup> School of Forestry & Landscape Architecture, Anhui Agricultural University, Hefei 230036, China

\*Corresponding author: Qingkui Wang

E-mail address: [qwang@iae.ac.cn](mailto:qwang@iae.ac.cn)

Tel: +8624 8397 0206

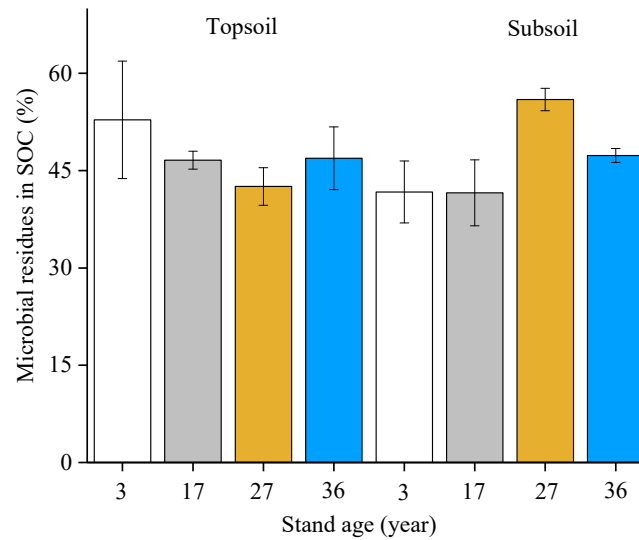

**Figure S1. Microbial residues in SOC across the Chinese fir chronosequence in southern China.** Values are the mean  $\pm$  SE.

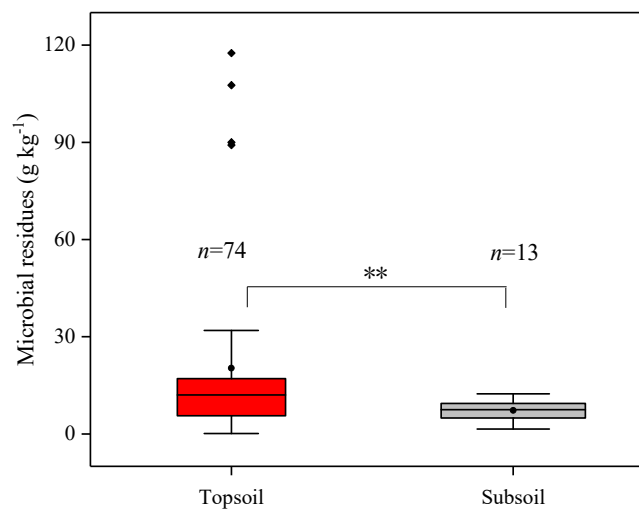

**Figure S2. Microbial residues in topsoil and subsoil at a global scale.** Data are from Ni et al. [1].

## Reference

1. Ni, X.; Liao, S.; Tan, S.; Peng, Y.; Wang, D.; Yue, K.; Wu, F.Z.; Yang, Y. The vertical distribution and control of microbial necromass carbon in forest soils. *Glob. Ecol. Biogeogr.* **2020**, *29*, 1829–1839.
